# Supplementary material
Source: PubMed Central journal article supplement (PMC3839743)
Supplement: 1311316110_pnas.201311316SI.pdf [file 1311316110_pnas.201311316SI.pdf]

# Supporting Information

Gan and Frohlich 10.1073/pnas.1311316110

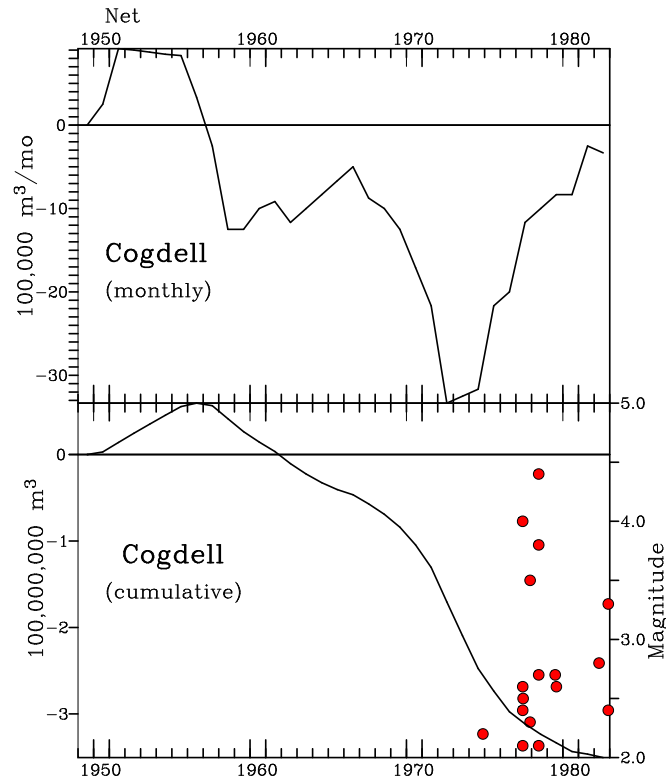

**Fig. S1.** Monthly rates (*Upper*) and cumulative volumes (*Lower*) of liquid extracted at the Cogdell field for 1949–1982 as reported by Davis and Pennington (1). Rates and volumes plotted are oil plus water extracted minus water injected. Red circles are Cogdell earthquakes as reported by the National Earthquake Information Center (NEIC), the International Seismological Center (ISC), and Davis (2) from inspection of seismograms recorded at Lubbock, TX.

1. Davis SD, Pennington WD (1989) Induced seismic deformation in the Cogdell oil field of west Texas. *Bull Seismol Soc Am* 79:1477–1495.
2. Davis SD (1985) Investigations of natural and induced seismicity in the Texas Panhandle. MS thesis (Univ Texas Austin, Austin, TX), p 230.











**Table S3. Epicenters determined by relocation using the double-difference method (1) with focal depths fixed arbitrarily at 5 km**

| Year | mo | d  | h  | mi | s      | Latitude,° | Longitude,° | Mag | rms   |
|------|----|----|----|----|--------|------------|-------------|-----|-------|
| 2009 | 5  | 26 | 14 | 31 | 6.930  | 32.93369   | -100.90347  | 2.9 | 0.072 |
| 2009 | 6  | 29 | 4  | 33 | 0.280  | 32.87752   | -100.89502  | 1.8 | 0.068 |
| 2009 | 7  | 31 | 9  | 21 | 51.280 | 32.80895   | -100.92980  | 2.3 | 0.081 |
| 2009 | 7  | 31 | 18 | 39 | 28.940 | 32.93098   | -100.90223  | 3.6 | 0.086 |
| 2009 | 8  | 12 | 14 | 48 | 39.390 | 32.91095   | -100.87277  | 2.0 | 0.090 |
| 2009 | 8  | 25 | 19 | 45 | 13.840 | 32.87746   | -100.89560  | 3.0 | 0.065 |
| 2009 | 8  | 26 | 2  | 1  | 51.130 | 32.87560   | -100.89650  | 2.4 | 0.085 |
| 2009 | 8  | 28 | 23 | 14 | 19.960 | 32.87261   | -100.89848  | 2.4 | 0.062 |
| 2009 | 9  | 1  | 10 | 36 | 55.950 | 32.93701   | -100.89541  | 2.4 | 0.075 |
| 2009 | 10 | 11 | 4  | 10 | 54.350 | 32.92989   | -100.90093  | 2.0 | 0.089 |
| 2009 | 10 | 16 | 23 | 50 | 15.240 | 32.90931   | -100.87753  | 3.5 | 0.073 |
| 2009 | 11 | 15 | 18 | 41 | 30.640 | 32.87471   | -100.89629  | 2.3 | 0.065 |
| 2009 | 11 | 26 | 15 | 20 | 38.470 | 32.91125   | -100.87443  | 2.0 | 0.086 |
| 2009 | 12 | 28 | 11 | 56 | 7.330  | 32.93594   | -100.89720  | 2.0 | 0.108 |
| 2010 | 1  | 5  | 13 | 36 | 11.380 | 32.93739   | -100.89561  | 2.1 | 0.071 |
| 2010 | 1  | 8  | 6  | 17 | 42.860 | 32.94754   | -100.88601  | 2.1 | 0.049 |
| 2010 | 1  | 8  | 21 | 27 | 8.080  | 32.94738   | -100.88595  | 2.6 | 0.086 |
| 2010 | 1  | 27 | 4  | 59 | 32.390 | 32.87156   | -100.90045  | 3.1 | 0.105 |
| 2010 | 1  | 27 | 6  | 25 | 43.950 | 32.86911   | -100.90491  | 2.9 | 0.082 |
| 2010 | 2  | 6  | 5  | 4  | 8.870  | 32.93069   | -100.90382  | 2.3 | 0.163 |
| 2010 | 2  | 10 | 2  | 51 | 41.660 | 32.88150   | -100.90250  | 2.4 | 0.074 |
| 2010 | 2  | 13 | 11 | 21 | 23.130 | 32.86150   | -100.90096  | 2.5 | 0.080 |
| 2010 | 3  | 22 | 13 | 42 | 51.490 | 32.89176   | -100.89473  | 2.1 | 0.070 |
| 2010 | 3  | 24 | 5  | 2  | 9.520  | 32.89643   | -100.92702  | 1.9 | 0.046 |
| 2010 | 3  | 24 | 20 | 50 | 4.880  | 32.89239   | -100.89441  | 2.7 | 0.067 |
| 2010 | 3  | 28 | 21 | 7  | 23.360 | 32.95127   | -100.88199  | 2.7 | 0.076 |
| 2010 | 3  | 30 | 6  | 18 | 1.820  | 32.86898   | -100.91271  | 2.2 | 0.080 |
| 2010 | 4  | 3  | 13 | 8  | 48.470 | 32.92860   | -100.90295  | 2.8 | 0.102 |
| 2010 | 4  | 9  | 21 | 15 | 59.900 | 32.93103   | -100.90353  | 2.2 | 0.094 |
| 2010 | 4  | 11 | 19 | 56 | 36.680 | 32.92944   | -100.90271  | 3.2 | 0.088 |
| 2010 | 4  | 12 | 0  | 20 | 5.340  | 32.93182   | -100.89978  | 2.8 | 0.076 |
| 2010 | 5  | 1  | 10 | 20 | 50.190 | 32.86531   | -100.93324  | 1.8 | 0.152 |
| 2010 | 5  | 1  | 10 | 46 | 39.220 | 32.86644   | -100.92968  | 2.9 | 0.097 |
| 2010 | 5  | 8  | 5  | 7  | 10.030 | 32.93771   | -100.89642  | 1.9 | 0.118 |
| 2010 | 5  | 15 | 10 | 43 | 1.820  | 32.92684   | -100.90781  | 2.3 | 0.147 |
| 2010 | 6  | 5  | 3  | 31 | 17.860 | 32.86855   | -100.89926  | 1.9 | 0.073 |
| 2010 | 6  | 5  | 4  | 6  | 51.710 | 32.94828   | -100.88364  | 2.7 | 0.097 |
| 2010 | 6  | 10 | 9  | 28 | 4.660  | 32.92624   | -100.90977  | 1.8 | 0.090 |
| 2010 | 6  | 23 | 0  | 39 | 7.550  | 32.89208   | -100.89223  | 2.5 | 0.071 |
| 2010 | 6  | 23 | 18 | 34 | 11.960 | 32.90010   | -100.92205  | 2.2 | 0.096 |
| 2010 | 6  | 25 | 17 | 45 | 58.180 | 32.94785   | -100.89964  | 3.0 | 0.068 |
| 2010 | 6  | 25 | 20 | 17 | 23.840 | 32.94730   | -100.89836  | 2.2 | 0.092 |
| 2010 | 6  | 25 | 23 | 14 | 54.080 | 32.94660   | -100.89754  | 2.4 | 0.089 |
| 2010 | 7  | 11 | 8  | 34 | 56.430 | 32.88440   | -100.90612  | 2.5 | 0.069 |
| 2010 | 7  | 17 | 2  | 44 | 35.390 | 32.90715   | -100.88365  | 1.8 | 0.061 |
| 2010 | 7  | 20 | 17 | 12 | 28.680 | 32.90445   | -100.87633  | 3.0 | 0.075 |
| 2010 | 7  | 22 | 4  | 44 | 0.060  | 32.94817   | -100.89915  | 2.9 | 0.094 |
| 2010 | 7  | 22 | 23 | 28 | 5.800  | 32.93533   | -100.89507  | 2.9 | 0.083 |
| 2010 | 7  | 25 | 0  | 41 | 23.380 | 32.94630   | -100.88605  | 2.5 | 0.080 |
| 2010 | 7  | 28 | 11 | 49 | 57.680 | 32.89631   | -100.92844  | 1.9 | 0.081 |
| 2010 | 7  | 29 | 12 | 19 | 19.910 | 32.88315   | -100.91032  | 2.8 | 0.080 |
| 2010 | 8  | 6  | 6  | 39 | 45.000 | 32.93178   | -100.89928  | 3.2 | 0.085 |
| 2010 | 8  | 8  | 1  | 12 | 38.130 | 32.87533   | -100.89779  | 3.4 | 0.078 |
| 2010 | 8  | 8  | 2  | 10 | 7.490  | 32.87357   | -100.90027  | 2.0 | 0.171 |
| 2010 | 8  | 8  | 7  | 31 | 9.000  | 32.86706   | -100.90028  | 2.8 | 0.077 |
| 2010 | 8  | 8  | 11 | 47 | 18.150 | 32.87078   | -100.90039  | 2.7 | 0.086 |
| 2010 | 8  | 10 | 19 | 56 | 23.560 | 32.93225   | -100.89944  | 2.1 | 0.127 |
| 2010 | 8  | 11 | 3  | 6  | 59.110 | 32.87365   | -100.90312  | 2.4 | 0.069 |
| 2010 | 8  | 11 | 8  | 7  | 30.160 | 32.84985   | -100.91677  | 2.7 | 0.081 |
| 2010 | 8  | 11 | 8  | 51 | 14.340 | 32.85085   | -100.91650  | 2.2 | 0.086 |
| 2010 | 8  | 13 | 15 | 3  | 15.370 | 32.94770   | -100.88596  | 2.4 | 0.100 |
| 2010 | 8  | 14 | 8  | 27 | 31.030 | 32.86646   | -100.90155  | 1.7 | 0.074 |

Table S3. Cont.

| Year | mo | d  | h  | mi | s      | Latitude,° | Longitude,° | Mag | rms   |
|------|----|----|----|----|--------|------------|-------------|-----|-------|
| 2010 | 8  | 14 | 10 | 49 | 3.690  | 32.94912   | -100.89742  | 2.1 | 0.092 |
| 2010 | 8  | 14 | 19 | 49 | 29.520 | 32.95174   | -100.89634  | 2.3 | 0.070 |
| 2010 | 8  | 15 | 12 | 55 | 43.840 | 32.95568   | -100.87695  | 1.7 | 0.073 |
| 2010 | 8  | 22 | 0  | 27 | 22.340 | 32.88015   | -100.89494  | 2.0 | 0.072 |
| 2010 | 8  | 25 | 2  | 5  | 14.220 | 32.94224   | -100.89045  | 2.8 | 0.080 |
| 2010 | 8  | 28 | 13 | 35 | 31.980 | 32.89254   | -100.89574  | 2.1 | 0.068 |
| 2010 | 8  | 29 | 5  | 34 | 20.250 | 32.97548   | -100.83881  | 1.9 | 0.068 |
| 2010 | 8  | 29 | 12 | 48 | 36.920 | 32.94930   | -100.89818  | 2.6 | 0.066 |
| 2010 | 8  | 31 | 6  | 11 | 41.170 | 32.94822   | -100.90033  | 2.1 | 0.132 |
| 2010 | 8  | 31 | 15 | 56 | 5.310  | 32.92727   | -100.91029  | 2.8 | 0.091 |
| 2010 | 9  | 1  | 10 | 58 | 24.040 | 32.89584   | -100.89478  | 1.9 | 0.066 |
| 2010 | 9  | 1  | 11 | 29 | 40.330 | 32.89452   | -100.89502  | 1.9 | 0.096 |
| 2010 | 9  | 1  | 16 | 53 | 58.730 | 32.94772   | -100.88591  | 2.6 | 0.089 |
| 2010 | 9  | 3  | 3  | 34 | 47.430 | 32.97729   | -100.83728  | 2.5 | 0.067 |
| 2010 | 9  | 30 | 3  | 44 | 24.260 | 32.95070   | -100.89815  | 2.4 | 0.066 |
| 2010 | 10 | 2  | 20 | 37 | 49.460 | 32.95337   | -100.89901  | 2.6 | 0.090 |
| 2010 | 10 | 9  | 7  | 42 | 26.650 | 32.95378   | -100.90072  | 3.1 | 0.097 |
| 2010 | 10 | 9  | 9  | 13 | 0.820  | 32.95631   | -100.89751  | 2.0 | 0.100 |
| 2010 | 10 | 9  | 15 | 51 | 56.600 | 32.95666   | -100.90025  | 2.1 | 0.113 |
| 2010 | 10 | 10 | 8  | 20 | 0.680  | 32.90051   | -100.87720  | 2.7 | 0.076 |
| 2010 | 10 | 10 | 10 | 27 | 48.970 | 32.97366   | -100.84705  | 2.1 | 0.103 |
| 2010 | 10 | 12 | 7  | 59 | 32.690 | 32.89605   | -100.92686  | 1.9 | 0.072 |
| 2010 | 10 | 17 | 2  | 9  | 16.110 | 32.92612   | -100.90992  | 2.1 | 0.138 |
| 2010 | 10 | 26 | 6  | 56 | 28.940 | 32.92793   | -100.89966  | 3.1 | 0.108 |
| 2010 | 11 | 1  | 9  | 10 | 57.400 | 32.97683   | -100.83755  | 2.8 | 0.068 |
| 2010 | 11 | 10 | 11 | 6  | 26.620 | 32.95483   | -100.89198  | 2.1 | 0.145 |
| 2010 | 11 | 12 | 22 | 17 | 54.280 | 32.97174   | -100.85622  | 2.5 | 0.103 |
| 2010 | 11 | 14 | 0  | 40 | 24.760 | 32.89586   | -100.89577  | 1.8 | 0.105 |
| 2010 | 12 | 7  | 22 | 35 | 44.480 | 32.92649   | -100.90888  | 2.5 | 0.042 |

Mag, magnitude; rms, rms residual.

1. Waldhauser F, Ellsworth WL (2000) A double-difference earthquake location algorithm: Method and application to the northern Hayward Fault, California. *Bull Seismol Soc Am* 90: 1353–1368.
